# Supplementary material for: Rapid Identification of Geographical Origin of Commercial Soybean Marketed in Vietnam by ICP-MS
Source: J Anal Methods Chem. 2021 Oct 30;2021:5583860. doi: 10.1155/2021/5583860 (PMC8572128; doi:10.1155/2021/5583860)
Supplement: Supplementary Materials — Figures S1–S5 and Table S1 are provided. [file 5583860.f1.zip]

Archive with 6 entries (6 files):
- 5583860.f1/Figure S1.docx
- 5583860.f1/Figure S2.docx
- 5583860.f1/Figure S3.docx
- 5583860.f1/Figure S4.docx
- 5583860.f1/Figure S5.docx
- 5583860.f1/Table S1 (1).docx
