# Supplementary material for: Rapid Identification of Geographical Origin of Commercial Soybean Marketed in Vietnam by ICP-MS
Source: J Anal Methods Chem. 2021 Oct 30;2021:5583860. doi: 10.1155/2021/5583860 (PMC8572128; doi:10.1155/2021/5583860)
Supplement: Supplementary Materials — Figures S1–S5 and Table S1 are provided. [file 5583860.f1.zip › 5583860.f1/Figure S1.docx]

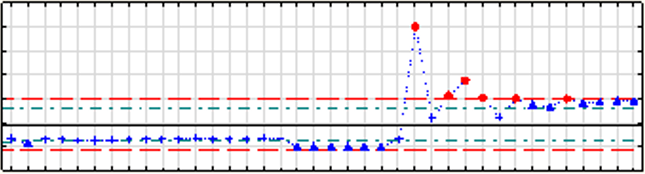

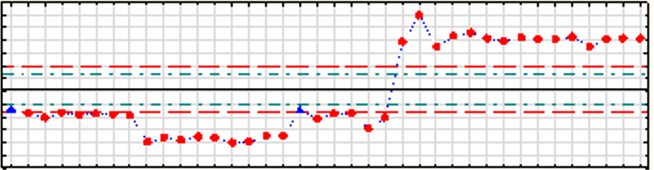

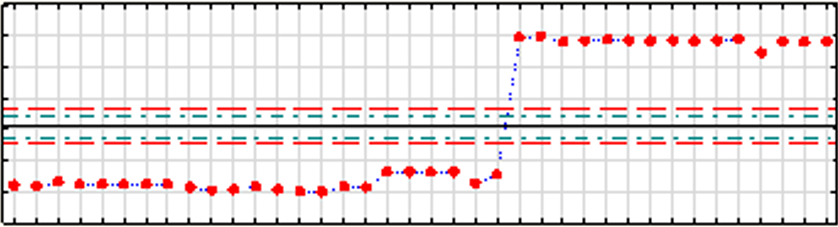


**Figure S1c**. X and Moving R chart of 137Ba


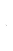


0.6

0.8

1.0

1.2

0.4

Can01

Can02

0.2

0

-0.2

Can03

Can04

Can05

Can06

Can07

Can08

US01

US02

US03

US04

US05

US06

US07

US08

US09

Bra01

Bra02

Bra03

Bra04

Bra05

VN01

VN02

VN03

VN04

VN05

VN06

VN07

VN08

VN09

VN10

VN11

VN12

VN13

VN14

VN15

Bra06

X and Moving R Chart; variable: 137 Ba

0.395

0.324

0.183

0.041

-0.030

**Figure S1b**. X and Moving R chart of 78Se

X and Moving R Chart; variable: 78 Se

0.232

0.292

0.411

0.530

0.589

Bra06

VN15

VN14

VN13

VN12

VN11

VN10

VN09

VN08

VN07

VN06

VN05

VN04

VN03

VN02

VN01

Bra05

Bra04

Bra03

Bra02

Bra01

US09

US08

US07

US06

US05

US04

US03

US02

US01

Can08

Can07

Can06

Can05

Can04

Can03

-0.2

0

0.2

Can02

Can01

0.4

1.2

1.0

0.8

0.6


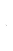


X and Moving R Chart; variable: 88 Sr

**Figure S1a**. X and Moving R chart of 88Sr


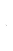


0.6

0.8

1.0

1.2

0.4

Can01

Can02

0.2

0

-0.2

Can03

Can04

Can05

Can06

Can07

Can08

US01

US02

US03

US04

US05

US06

US07

US08

US09

Bra01

Bra02

Bra03

Bra04

Bra05

VN01

VN02

VN03

VN04

VN05

VN06

VN07

VN08

VN09

VN10

VN11

VN12

VN13

VN14

VN15

Bra06

0.525

0.489

0.416

0.342

0.306
